# 1 Differences in the rare variant spectrum among human populations

2 Iain Mathieson<sup>1</sup>, David Reich<sup>1,2,3</sup>

3  
4 <sup>1</sup> Department of Genetics, Harvard Medical School, Boston, Massachusetts 02115, USA.  
5 <sup>2</sup> Broad Institute of MIT and Harvard, Cambridge, Massachusetts 02142, USA.  
6 <sup>3</sup> Howard Hughes Medical Institute, Harvard Medical School, Boston, Massachusetts 02115, USA.

## 8 Abstract

9  
10 Mutations occur at vastly different rates across the genome, and populations, leading to differences in the  
11 spectrum of segregating polymorphisms. Here, we investigate variation in the rare variant spectrum in a sample of  
12 human genomes representing all major world populations. We find at least two distinct signatures of variation.  
13 One, consistent with a previously reported signature is characterized by an increased rate of TCC>TTC mutations  
14 in people from Western Eurasia and South Asia, likely related to differences in the rate, or efficiency of repair, of  
15 damage due to deamination of methylated guanine. We describe the geographic extent of this signature and show  
16 that it is detectable in the genomes of ancient, but not archaic humans. The second signature is private to certain  
17 Native American populations, and is concentrated at CpG sites. We show that this signature is not driven by  
18 differences in the CpG mutation rate, but is a result of the fact that highly mutable CpG sites are more likely to  
19 undergo multiple independent mutations across human populations, and the spectrum of such mutations is highly  
20 sensitive to recent demography. Both of these effects dramatically affect the spectrum of rare variants across  
21 human populations, and should be taken into account when using mutational clocks to make inference about  
22 demography.

## 24 Introduction

25  
26 For a process that provides such a fundamental contribution to genetic diversity, the human germline  
27 mutation rate is surprisingly poorly understood. Different estimates of the absolute mutation rate—the mean  
28 number of mutations per-generation, or per-year—are largely inconsistent with each other [1, 2], and similar  
29 uncertainty surrounds parameters such as the paternal age effect [3-5], the effect of life-history traits [6, 7], and  
30 the sequence-context determinants of mutations [5, 8]. Here, we investigate a related question. Rather than trying

31 to determine the absolute values of parameters of the mutation rate, we ask how much the mutation spectrum–  
 32 specifically, the relative rate of different classes of mutations–varies between different human populations.  
 33 Because we are limited in our ability to observe the mutation rate directly (for example through studies of *de novo*  
 34 mutations), we use the spectrum of segregating variation as a proxy. However, the relationship between mutation  
 35 spectrum and variation spectrum can be affected by many factors, including selection, demography,  
 36 recombination and gene conversion.

37

38 At least one class of polymorphism, most clearly represented by the trinucleotide mutation TCC>TTC but  
 39 apparently including other classes as well, is known to be enriched in Europeans relative to East Asians and  
 40 Africans [8, 9]. However the geographical extent, history, and biological basis for this signal are unclear. Analysis  
 41 of tumor genomes has demonstrated a number of different mutational signatures operating at different rates in  
 42 somatic cells and cancers, many of which can be linked to specific biological processes or environmental  
 43 exposures [10-12]. It seems plausible that population-specific genetic factors of environmental exposures might  
 44 similarly lead to variation in germline mutation spectra. Therefore, we used a dataset of high coverage genomes,  
 45 representing much of the genetic diversity in present-day humans, to investigate the following three questions.  
 46 First, is there evidence of any other differences in the spectrum of segregating variation across the world? Second,  
 47 are these differences in variation driven by differences in mutation rates? Finally, if so, can we infer anything  
 48 about the biological processes driving these differences?

49

## 50 Results

51

52 We first analyzed data from 300 individuals sequenced to high coverage (mean coverage depth 43X) as  
 53 part of the Simons Genome Diversity project [13] (SGDP). We classified single nucleotide polymorphisms  
 54 (SNPs) into one of 96 mutational classes according to the SNP, and the two flanking bases. We represent these by  
 55 the ancestral sequence and the derived base so for example “ACG>T” represents the ancestral sequence 3’-ACG-  
 56 5’ mutating to 3’-ATG-5’. We first focused on variants where there were exactly two copies of the derived allele  
 57 in the entire sample of 300 individuals (we call these  $f_2$  variants or doubletons). This increases power to detect  
 58 population-specific variation because rare variants tend to be recent mutations and are therefore highly  
 59 differentiated between populations [14]. For each individual, we counted the number of  $f_2$  mutations in each  
 60 mutational class that they carried, and normalized by the number of ATA>C mutations (the most common class  
 61 and one that did not seem to vary across populations in a preliminary analysis). The normalized mutation  
 62 intensities form a  $96 \times 300$  matrix, and we used non-negative matrix factorization [11, 15] (NMF, implemented in  
 63 the *NMF* package [16] in R) to identify specific mutational features. NMF decomposes a matrix into a set of

sparse factors, here putatively representing different mutational processes, and individual-specific loadings for each factor, measuring the intensity of each process in each individual. It has been used extensively in the analysis of somatic mutations in cancer genomes [10, 11, 17, 18]. An advantage over PCA is that NMF tends to provide components that are sparser and more interpretable.

NMF requires us to specify the number of signatures (the factorization rank) in advance. For  $f_2$  variants we chose a factorization rank of 4, based on standard diagnostic criteria (Supplementary Fig. 1). This identified four mutational signatures; of which two were uncorrelated with each other, were robust across frequencies, replicated in non-cell-line samples, were consistent across samples from the same populations, and had clear geographic distributions (Figure 1, Supplementary Fig. 2). Signature 1 corresponds to the previously described European signal [8] characterized by TCC>T, ACC>T, CCC>T and TCT>T (possibly also including CCG>T, which overlaps with signature 2). Loadings of this component almost perfectly separate West Eurasians from other populations, with South-West Asians intermediate. It is seen most strongly in Western and Mediterranean Europe, with decreasing intensity in Northern and Eastern Europe, the Near East and South-west Asia. The COSMIC catalog of somatic mutation in cancer [19] is a database of mutational signatures extracted from samples of tumor genomes, also using NMF. Comparing with all the COSMIC signatures, we found that our signature 1 is most similar to COSMIC signature 11 (Pearson correlation  $\rho=0.81$ ) which is most commonly found in melanoma and glioblastoma and is associated with use of chemotherapy drugs which act as alkylating agents, damaging DNA through guanine methylation.

Signature 2 is restricted to some South and Central American populations and, possibly, Aboriginal Australians. It is characterized by NCG>T mutations similar to the signature caused by deamination of methylated cytosine at CpG sites, corresponding to COSMIC signature 1 ( $\rho=0.96$ ). Interestingly, this signal is found in South America in Andean populations like Quechua and Piapoco, and in Central American populations such as Mayan and Nahua, but not in the closely related Amazonian Surui and Karitiana, nor in North American populations.

The remaining two signatures are more difficult to characterize (Supplementary Fig. 2). Signature 3 is characterized by GT>GG mutations, particularly GTG>GGG. It is found in some East Asian and some South American populations but is not consistent within populations. For example, it is strongest in one Han sample (B\_Han-3), but not at all increased in the two other samples from the same population. All affected samples are derived from cell lines. It does not match any mutational signature seen in COSMIC (maximum  $\rho=0.16$ ). Plausibly this represents some as-yet uncharacterized cell-line artifact, or a very localized difference in mutation process. Signature 4 affects almost all mutation types, possibly representing a background mutation spectrum, and is most correlated with COSMIC signature 5 ( $\rho=0.60$ ) which is found in all cancers and has unknown aetiology. It

is significantly reduced in only a single cell-line derived sample (S\_Quechua-2), so probably represents some unidentified cell-line or data processing artifact.

We checked whether these effects could be detected in singletons. At  $f_1$  the variation is apparently dominated by cell line artifacts because principal component analysis (PCA) separates cell line from non cell line derived samples (Supplementary Fig. 3A). However, NMF on  $f_1$  variants excluding cell line derived samples recovers signatures consistent with signatures 1 and 2 (Supplementary Fig. 3B-C), although it does not substantially separate out Native Americans based on signature 2. PCA on  $f_2$  variants does not distinguish cell line samples, but does separate samples by geographic region, and recovers factor loadings consistent with NMF-derived signatures 1-3 (Supplementary Fig. 4). To check that our results were not an artifact of the normalization we used, we repeated the analysis normalizing by the total number of mutations in each sample, rather than the number of ATA>C mutations, and obtained equivalent results (Supplementary Figure 5).

We replicated these results using data from phase 3 of the 1000 Genomes project [20] (Methods). To do this, we counted  $f_2$  and  $f_3$  variants in each trinucleotide class and then, for each individual, computed the proportion of the total mutations carried by that individual that were in each of signatures 1 and 2 (Figure 2). This confirmed that that mutations consistent with signature 1 are enriched in populations of European and South Asian ancestry (Figure 2A; mean proportions 0.085, 0.077; Z-score for difference  $Z=42$ ; for European/South Asian compared to all other populations) and that mutations consistent with signature 2 are enriched in Peruvians in Lima (PEL) and people of Mexican ancestry in Los Angeles (MXL) – the two 1000 Genomes populations with the most Native American ancestry (Figure 2B; mean proportions 0.216, 0.172;  $Z=34$  for PEL+MXL compared to all other populations). Thus, the observed differences in the spectrum of variation are consistent across datasets. We then asked whether these differences could be interpreted as differences in the mutational spectrum.

To investigate whether non-mutational processes could be driving these differences, we first investigated the dependence of the two signatures on four genomic features. First we investigated dependence on transcriptional strand by classifying each mutation (not collapsed with its reverse complement, and defined on the + strand) according to whether it was on the coding or noncoding strand obtained from the UCSC genome browser (Methods). Signature 1 shows a skew whereby the C>T mutation is more likely to occur on the transcribed (i.e. noncoding) strand in West Eurasians, relative to populations from other regions (Figure 3 A&B). Because transcription coupled repair is more likely to repair mutations on the transcribed strand [21] this result, consistent with Harris (2015) [8], suggests that the excess signature 1 mutations in West Eurasians are driven more by G>A than by C>T mutations. Signature 2 shows a global skew where the C>T mutation is more likely to occur on the untranscribed strand, consistent with these mutations resulting from deamination of methylated

132 cytosine, and we do not see a significant difference between individuals with high versus low levels of signature 2  
 133 mutations (Figure 3 C,D). Second, we obtained methylation data for a testis cell line, produced by the  
 134 Encyclopedia of DNA Elements (ENCODE) project [22]. Signature 2 mutations are ~8.5 times as likely to occur  
 135 in regions of high ( $\geq 50\%$ ) versus low ( $< 50\%$ ) methylation. We do not detect any difference in this ratio between  
 136 regions, or between individuals with high versus low signature 2 rates, although the number of mutations involved  
 137 is probably too low to provide much power (Methods; Fisher's exact test  $P=0.14$ ). Third, we tested dependence on  
 138  $B$  statistic [23], a measure of conservation. We found that the relative magnitudes of both signatures 1 and 2  
 139 depend on  $B$  statistic, but that both these dependencies were independent of the per-population intensities of the  
 140 signatures (Figure 4 A,B). This, along with a similar result for recombination rate, (Figure 4 C,D) confirm that  
 141 these differences are not strongly associated with differences between population in patterns of selection,  
 142 recombination, or recombination-related processes such as gene conversion.

143  
 144 Most of the variation in signature 2, however, can be explained by differences in demography between  
 145 populations (Figure 5). In particular, a relatively high proportion of signature 2 mutations are repeat mutations  
 146 (i.e. mutations that have occurred more than once in different individuals), and the frequency spectrum of such  
 147 mutations is more sensitive to demography—particularly recent expansions—than non-repeat mutations. To show  
 148 this, we first looked at the proportion of variants at different frequencies that were in signature 2 (i.e. C->T  
 149 mutations at CpG sites; Figure 5A). There is a strong enrichment of these variants in Native Americans at  
 150 frequency 2, but not for singletons, nor for frequencies greater than 3. It is hard to imagine a purely mutational  
 151 process that would affect variants of frequency 2, but not 1. Next, instead of restricting to variants of a particular  
 152 frequency, we counted the proportion of derived alleles per genome that are in signature 2 (Figure 5B, Methods).  
 153 While there is an increase in this proportion in Native Americans, it is extremely small – an increase in proportion  
 154 of  $1.6 \times 10^{-5}$  relative to East Asians. Further, this increase is not restricted to Native Americans with high rates of  
 155 signature 2  $f_2$  mutations. This suggests that while there may be subtle variation in the rate of signature 2  
 156 mutations, the effects we observed are not driven by this, but rather by the fact that signature 2 mutations have  
 157 been shifted into different frequency classes in different populations, relative to other mutations. One important  
 158 property of signature 2 mutations is that CpG sites have a much higher mutation rate than nonCpG sites [24], and  
 159 therefore a much higher rate of repeat mutations. For example, ~12% of *de novo* CpG mutations are expected to  
 160 occur at sites that are already polymorphic in 1000 Genomes phase 1 ( $n=1,092$ ) [25], and 87% of exonic *de novo*  
 161 CpG mutations are polymorphic in ExAC ( $n=60,706$ ) [26] – rates that are about ten times higher than those for  
 162 non-CpG mutations. In the SGDP ( $n=300$ ), 17.7% of signature 2  $f_2$  mutations are shared between Africans and  
 163 non-Africans, compared to 8.3% of all  $f_2$  mutations, suggesting that around 9% of signature 2  $f_2$  mutations are  
 164 repeat mutations. This shifts the relative frequency spectra because the spectrum of repeat mutations is more  
 165 sensitive to recent population growth than that of non-repeat mutations (a similar argument applies for triallelic

166 sites [27]). In particular, under recent population growth genealogies become more star-like and the numbers of  
 167 singleton non-repeat mutations increases, but the number of doubleton repeat mutations increases even more  
 168 (Figure 5C). This means that the ratio of CpG to non-CpG variants at any given frequency is extremely sensitive  
 169 to recent demography, and the patterns that we observe could be explained by recent exponential growth on the  
 170 order of between 10- and 100- fold in most populations (Figure 5D). Thus, it seems likely that differences in the  
 171 proportion of rare, or private, variants in this class is driven by differences in the rate of recent population growth  
 172 rather than differences in mutation rate and implies that Native American populations with high rates of rare  
 173 signature 2 mutations experienced rapid population growth after the initial founding bottleneck of the Americas.  
 174

175 In contrast, differences in signature 1 are consistent with a difference in mutation rate. In particular,  
 176 individuals with a high rate of signature 1  $f_2$  variants also have a high total proportion of signature 1 mutations  
 177 (Figure 6A), and we see enrichment in Europeans relative to other groups in singletons, and for variants with  
 178 allele counts up to around 30, corresponding to a frequency of around 5% (Figure 6B). The enrichment changes as  
 179 a function of frequency, which suggests that the increase in mutation rate might have changed over time.  
 180 Therefore, to study the time depth of these signals, we investigated whether signature 1 could be detected in  
 181 ancient samples by constructing a corrected statistic that measures the intensity of the mutations enriched in  
 182 signature 1, normalized to reduce spurious signals that arise from ancient DNA damage (methods). This statistic  
 183 is enriched to present-day European levels in both an eight thousand year old European hunter-gatherer and a  
 184 seven thousand year old Early European Farmer [28] but not in a 45,000 year old Siberian [29], nor in the  
 185 Neanderthal [30] or Denisovan [31] genomes (Figure 6C) – consistent with a recent estimate that this increase in  
 186 mutation rate lasted between 2,000 and 15,000 years before present [9]. The statistic is predicted by neither  
 187 estimated hunter-gatherer ancestry, nor early farmer ancestry, in 31 samples from 13 populations for which  
 188 ancestry estimates were available [28] (linear regression p-values 0.22 and 0.15, respectively). Thus the effect is  
 189 not strongly driven by this division of ancestry. If it has an environmental basis, it is not predicted by latitude  
 190 (linear regression of signature 1 loadings against latitude for West Eurasian samples;  $p=0.68$ ), but is predicted by  
 191 longitude ( $p=6 \times 10^{-8}$ ; increasing east to west).

192

## 193 Discussion

194

195 We characterized two independent differences among human populations in their spectrum of rare  
 196 variants, however this may not be comprehensive. Our power to detect differences in variation spectra depends on  
 197 a number of factors, including sample size, and the level of background variation. While modest differences in  
 198 variant spectra might be much more widespread than we describe here [9], it is clear that the West Eurasian



signature 1 enrichment is by far the most dramatic. Two questions naturally follow from this result. First, does this result imply a difference in absolute mutation rate? And second, what is the biological basis behind this signature?

202

In our previous analysis of the SGDP data [13] we showed that the rate of mutation accumulation differed between populations. In particular, mutation accumulation, relative to chimpanzee, was consistently around 0.1% higher in non-Khoesan groups than Khoesan groups, and around 0.5% higher in non-Africans than Africans. Since the mean divergence time between two humans is much less than the mean divergence between humans and chimp, these results imply a much greater difference in mutation rate – for example we estimated that the rate of mutation accumulation would be around 5% higher on the non-African relative to the non-African branch. The proportion of f2 mutations attributable to signature 1 (i.e TCT>T, TCC>T, CCC>T and ACC>T) increases from a mean of 7.8% in Africans to 10.0% (range 8.8-11.1%) in West Eurasians. If we make the assumptions that the only differences in mutation rate are the ones we detected, the absolute rates of all other mutation types are the same between populations, and the difference in mutation rate has been present for the entire period since the divergence of Africans and non-Africans, then this change implies a maximum increase in genome-wide mutation rate of 2.3% (range 1.1-3.6%). This is insufficient to explain the approximately 5% excess of mutations in West Eurasian in the SGDP data, and is also likely to be a large overestimate of the possible effect since Harris and Pritchard suggest that the elevated rate of mutation accumulation in this class was largely restricted to 15,000 to 2,000 years ago instead of persisting over the whole period since the divergence of Africans and non-Africans [9]. In any case, as we previously observed [13], this cannot explain the difference in total mutation accumulation rate, because that effect is not restricted to West Eurasians.

220

We cannot be definitive about the biological cause of variation in signature 1, but our analyses provide a clue. In terms of the immediate mutagenic cause, signature 1 is most similar to COSMIC [19] signature 11 (Pearson correlation  $\rho=0.81$ ), which is associated with alkylating agents used as chemotherapy drugs, damaging DNA through guanine methylation. The reversal of transcriptional strand bias for this signature in West Eurasians supports the idea that the increased rate of these mutations in West Eurasians is driven by damage to guanine bases, consistent with deamination of methyl-guanine to adenine, leading to the G>A (equivalently C>T) mutations that we observe. An increase in this rate might be driven by an increase in guanine methylation, either through environmental exposure, or through inherited variation that affected demethylation pathways. Signature 1 is also highly correlated with COSMIC signature 7 ( $\rho=0.75$ ), caused by ultraviolet (UV) radiation exposure but it is difficult to imagine how this could affect the germline, would not explain our observed increase in ACC>T mutations, would not be expected to reverse the strand bias, and should produce an enrichment of CC>TT dinucleotide mutations in West Eurasians that we do not observe ( $p=0.41$ ). Harris (2015) [8] suggested that UV

233 might cause germline mutations indirectly through folate deficiency in populations with light skin pigmentation  
 234 (since folate can be degraded in skin by UV radiation). It is unknown what mutational signature would be caused  
 235 by this effect, but the fact that we do not observe enrichment of signature 1 in other lightly pigmented populations  
 236 like Siberians and northeast Asians suggests that it is not driving the signal.

237

238 Our analysis of signature 2 underscores the importance of modeling repeat mutations, at least for CpG  
 239 sites, in rare variant analysis. One consequence is that any analysis that restricts to part of the frequency spectrum  
 240 is potentially confounded by this effect – this includes subtle effects that might arise from studies that have  
 241 differential power to call rare variants among samples – implying that it might be difficult to reliably detect  
 242 differences in CpG mutation rate from polymorphism data. Nonetheless it seems that the relative rate of CpG  
 243 mutation accumulation does vary across populations, but only very slightly. Our results also suggest that the  
 244 CpG:non-CpG ratio as a function of frequency could be a useful statistic for estimating the rate of recent  
 245 population growth and that some Native American populations have experienced extremely rapid growth in recent  
 246 history.

247

248 It is important to understand changes in the mutation rate on the timescale of hominin evolution in order  
 249 to calibrate demographic models of human evolution [32] and the observation of variation in mutation spectra  
 250 *between* populations [8] made this calibration even more complicated. Further work in this area will involve more  
 251 detailed measurement of mutation rates in diverse populations – to date, most work on somatic, cancer, or *de novo*  
 252 germline mutations has been conducted in populations of West Eurasian origin – and the extension of these  
 253 approaches to other populations will be required to fully understand variation in mutation rates and its  
 254 consequences for demographic modeling.

255



## 256 Methods

257

### 258 Identifying mutational signatures

259

260 We used SNPs called in 300 individuals from the Simons Genome Diversity Project [13] (SGDP). The  
 261 SGDP provides position- and sample-specific masks, with strictness ranging from 0-9 (0=least strict). We first  
 262 called variants at filter level 1, independently in each individual, which is recommended for most analyses. This  
 263 gave us a list of sites that were reliably variable in at least one of the 300 samples. Then, to avoid underestimating  
 264 the frequency of variants due to some samples being masked, we recalled all these sites in every individual at the  
 265 less strict filter level 0. We polarized SNPs assuming that the chimpanzee reference panTro2 carried the ancestral  
 266 allele (ignoring sites where the chimp genome could not be aligned to the human genome), and classified by the  
 267 two flanking bases in the human reference (hg19). We restricted to sites of given derived allele counts. For  
 268 example, when we analyze  $f_2$  variants, we consider both variants where a single individual is homozygous derived  
 269 and variants where any two separate individuals (ignoring population labels) are heterozygous derived. We count  
 270 two mutations if the individual is homozygous and one if it is heterozygous. We then merged reverse complement  
 271 classes to give counts of SNPs occurring in 96 possible mutational classes. Finally, we normalized these counts by  
 272 the frequency of ATA>ACA mutations. The remaining matrix represents the normalized intensity of each  
 273 mutation class in each sample, relative to the sample with the lowest intensity. Formally, let  $C_{ij}$  be the counts of  
 274 mutations in class  $i$  for sample  $j$ . Then, the intensities that we analyze,  $X_{ij}$  are given by,

275

$$276 \quad X_{ij} = \frac{C_{ij}}{C_{\{ATA>C\}j}}$$

277

278 We decomposed this matrix  $X$  using non-negative matrix factorization [15] implemented in the *NMF* R  
 279 package [16] with the multiplicative algorithm introduced by Lee & Seung [15], initialized using the non-negative  
 280 components from the output of a *fastICA* analysis [33] implemented in the *fastICA* package in R ([https://cran.r-](https://cran.r-project.org/web/packages/fastICA/index.html)  
 281 [project.org/web/packages/fastICA/index.html](https://cran.r-project.org/web/packages/fastICA/index.html)). For the diagnostic plots in Supplementary Fig. 2, we used 200  
 282 random starting points to compare the results of different runs. When we initialized the matrix randomly, rather  
 283 than using *fastICA*, we obtained a slightly closer fit to the data (root-mean-squared error in  $X$  of 0.024 vs 0.025)  
 284 and similar factor distributions (Supplementary Fig. 6A), except that all signatures were dominated by CpG  
 285 mutations (Supplementary Fig. 6B). Removing a constant amount of each CpG mutation from each signature  
 286 recovered signatures closer to the *fastICA*-initialized signatures (Supplementary Fig. 6C), so we concluded that  
 287 this was a model-fitting artifact, and did not reflect true signatures. Finally we performed the analysis on a matrix

288 normalized by the total number of mutations in each sample  $\sum_i C_{ij}$  rather than the number of ATA>C mutations.  
289 (Supplementary Figure 6).

290

291 The ordering of the factors is arbitrary so, where necessary, we reordered for interpretability. To plot  
292 mutational signatures and compare with the COSMIC signatures, we rescaled the intensities of each class  
293 according to the trinucleotide frequencies in the human reference genome. The scale of the weightings is therefore  
294 not easily interpretable. To perform principal component analysis on  $X$ , we normalized so that the variance of  
295 each row was equal to 1.

296

## 297 **Analysis of 1000 Genomes data**

298

299 We classified 1000 Genomes variants according to the ancestral allele inferred by the 1000 Genomes  
300 project, and counted the number of  $f_2$  and  $f_3$  variants carried by each individual in each mutation class. We ignored  
301 SNPs that were multi-allelic or where the ancestral state was not confidently assigned (confident assignment  
302 denoted by a capital letter in the “AA” tag in the “INFO” field of the vcf file). For each individual, we computed  
303 the proportion of the total mutations carried by that individual that were in each of signatures 1 and 2. We  
304 excluded the five outlying samples: HG01149 (CLM), NA20582 & NA20540 (TSI), NA12275 (CEU), NA19728  
305 (MXL) which had extreme values in one of these signatures.

306

## 307 **Transcriptional strand**

308

309 We downloaded the knownGenes table of the UCSC genes track from the UCSC genome browser  
310 (<http://genome.ucsc.edu/>). Taking the union of all transcripts in this table, we classified each base of the genome  
311 according to whether it was transcribed on the + or – strand, both, or neither (including uncalled bases). These  
312 regions totaled 607Mb, 637Mb, 36Mb and 1,599Mb of sequence respectively. We then counted mutations (not  
313 collapsed with their reverse complements) in our dataset that occurred in regions that were transcribed on the + or  
314 – strand, ignoring regions where both or neither strand was transcribed.

315

## 316 **Methylation status**

317

318 We downloaded the Testis\_BC 1 and 2 (two technical replicates from the same sample) tables from the  
319 HAIB Methyl RRBS track from the UCSC genome browser (<http://genome.ucsc.edu/>). We constructed a list of  
320 33,305 sites where both replicates had  $\geq 50\%$  methylation and another list of 166,873 sites where both replicates  
321 had  $< 50\%$  methylation. We then classified the CpG mutations in our dataset according to which, if either, of these

lists they fell into. Ultimately, there were only 1186 classified mutations in the whole dataset, including 43 in Native American samples and 12 in Native American samples with high rates of signature 2. Therefore, although we found no significant interactions between methylation status and population, it may be simply that we lack power to detect it.

326

## 327 ***B* statistic and recombination rate**

328

329 We classified each base of the genome according to which decile of *B* statistic [23] or HapMap 2  
330 combined recombination rate [34] (in 1kb blocks) it fell into and counted mutations in each class.

331

## 332 **Analysis of total number of mutations**

333

334 To count the total mutations per-genome in Figures 5A and 6A, we counted mutations at all frequencies,  
335 rather than restricting to variants at a particular frequency in the whole dataset. We excluded the last 20Mb of  
336 chromosome 2, where 46 samples had high rates of missing data.

337

## 338 **Coalescent simulations**

339

340 We simulated a sample of 50 haplotypes under the standard coalescent, by first simulating a coalescent  
341 tree, and then generating mutations on the tree as a Poisson process. For the simulations shown in Figure 5, we  
342 simulated 200,000 independent trees. To simulate repeat mutations, we simulated two mutations and performed  
343 an OR operation on the genotype vectors – this correctly captures the probabilities of nested and non-nested  
344 mutations. To simulate exponential growth, we first simulate under the standard coalescent, and then rescale time  
345  $t$  such that the new time  $t'$  is given by:

346

$$347 \quad t' = \begin{cases} \frac{1}{g}(e^{gt} - 1) & t \leq s \\ \frac{1}{g}(e^{gs} - 1) + (t - s) & t > s \end{cases}$$

348

349 where  $g = \frac{\log(N)}{s}$  to simulate  $N$ -fold growth starting at time  $s$ . We simulated for  $N=100$  and 1000 and chose

350  $s=0.01$  in coalescent time, corresponding to  $0.01 \times 2N_e$  generations, or around 9,000 years if we assume human-  
351 like parameters of  $N_e=15,000$  and a generation time of 30 years.

352

### 353 Analysis of ancient genomes

354

355 We identified heterozygous sites in five ancient genomes from published vcf files, and restricted to sites  
356 where there was a single heterozygote in the SGDP. The corrected signature 1 log-ratio is defined by

357

$$358 \quad M = \log_2 \left\{ \frac{X_{\{TCC>A\}j} X_{\{ACC>A\}j} X_{\{TCT>A\}j} X_{\{CCC>A\}j}}{X_{\{TCA>A\}j} X_{\{ACA>A\}j} X_{\{TCA>A\}j} X_{\{CCA>A\}j}} \right\}$$

359

360 and then normalized so that the distribution in African populations has mean 0 and standard deviation 1. We  
361 estimated bootstrap quantiles by resampling the counts  $C_{ij}$  for the ancient samples and recomputing  $M$ .

362

### 363 Increase in absolute mutation rate

364

365 Suppose that in a single sample there are  $M$  mutations in total, of which  $N$  are from a particular signature. Let

366  $p = \frac{N}{M}$ . Suppose the number of mutations in that signature increases by  $\Delta N$ , but the number of all other mutations

367 stays the same. Then the new proportion of mutations in the signature is  $q = \frac{N+\Delta N}{M+\Delta N}$ . Under these assumptions, the

368 increase in the total mutation rate  $\frac{\Delta N}{M} = \frac{q-p}{1-q}$ .

369

### 370 Code availability

371 Scripts used to run the analysis are available from <https://github.com/mathii/spectrum>.

372

### 373 Acknowledgments

374 We thank Mark Lipson, Priya Moorjani and Swapan Mallick for helpful comments. I.M. is supported by a  
375 long-term fellowship from the Human Frontier Science Program LT001095/2014-L. D.R. is supported by NIH  
376 grant GM100233 and is a Howard Hughes Medical Institute Investigator.

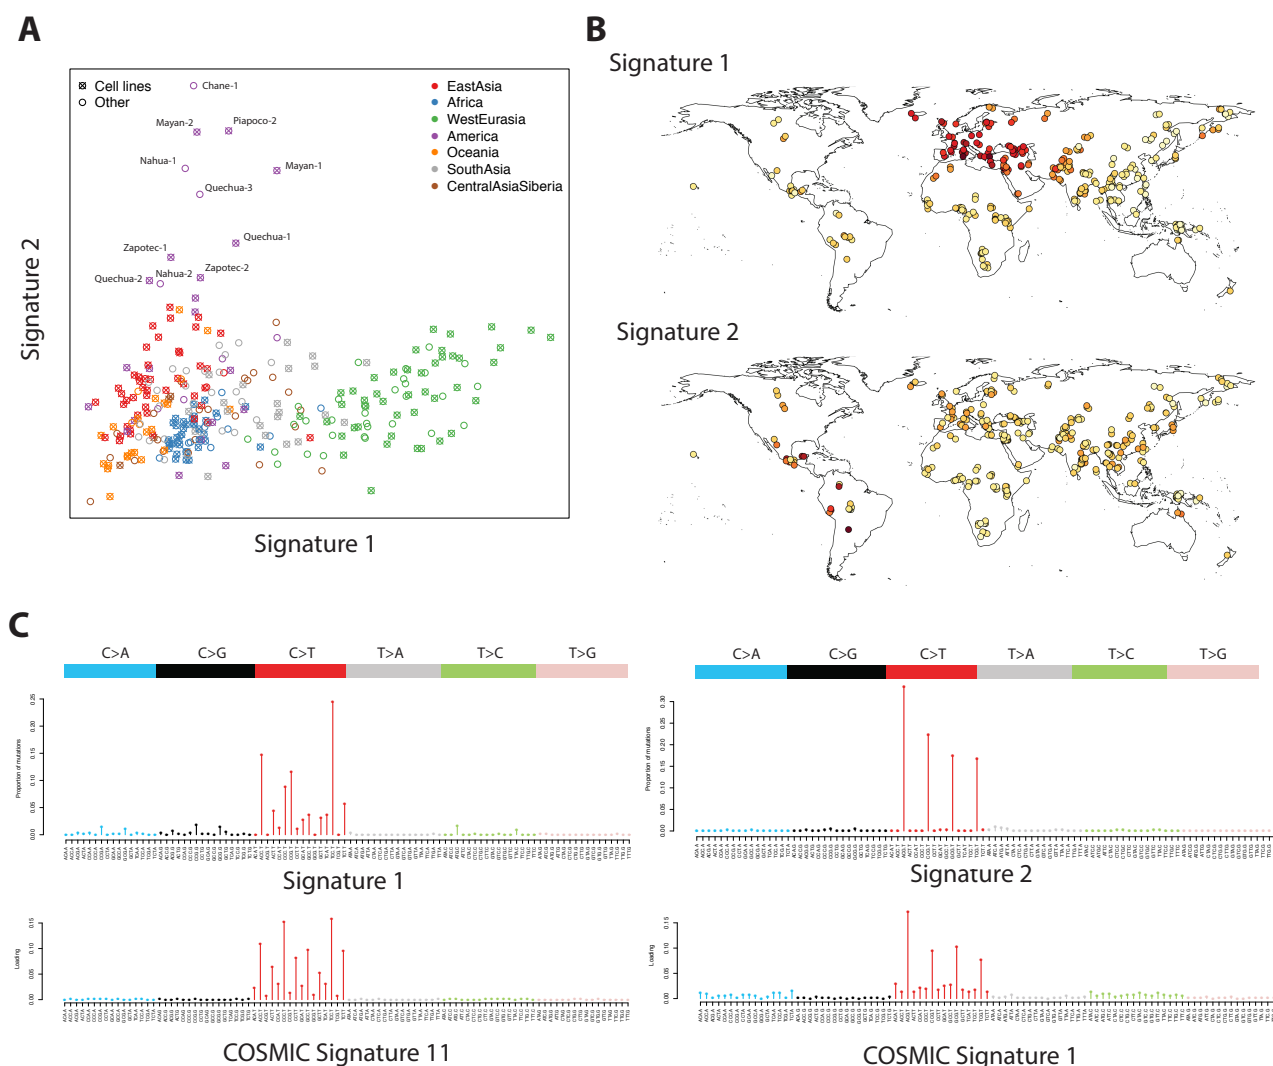

377

378 **Figure 1:** Distribution and characterization of signatures 1 and 2 for  $f_2$  variants. **A:** Factor coefficients for these  
379 two signatures, for 300 individual samples colored by region. **B:** Geographic representation of the factor loadings  
380 from panel **A**. Darker colors represent higher loadings. **C:** Characterization of the signatures in terms of mutation  
381 intensity for each of 96 possible classes. Bars are scaled by the frequency of each trinucleotide in the human  
382 reference genome. Below, the most highly correlated signatures from the COSMIC database are shown for  
383 comparison.

384

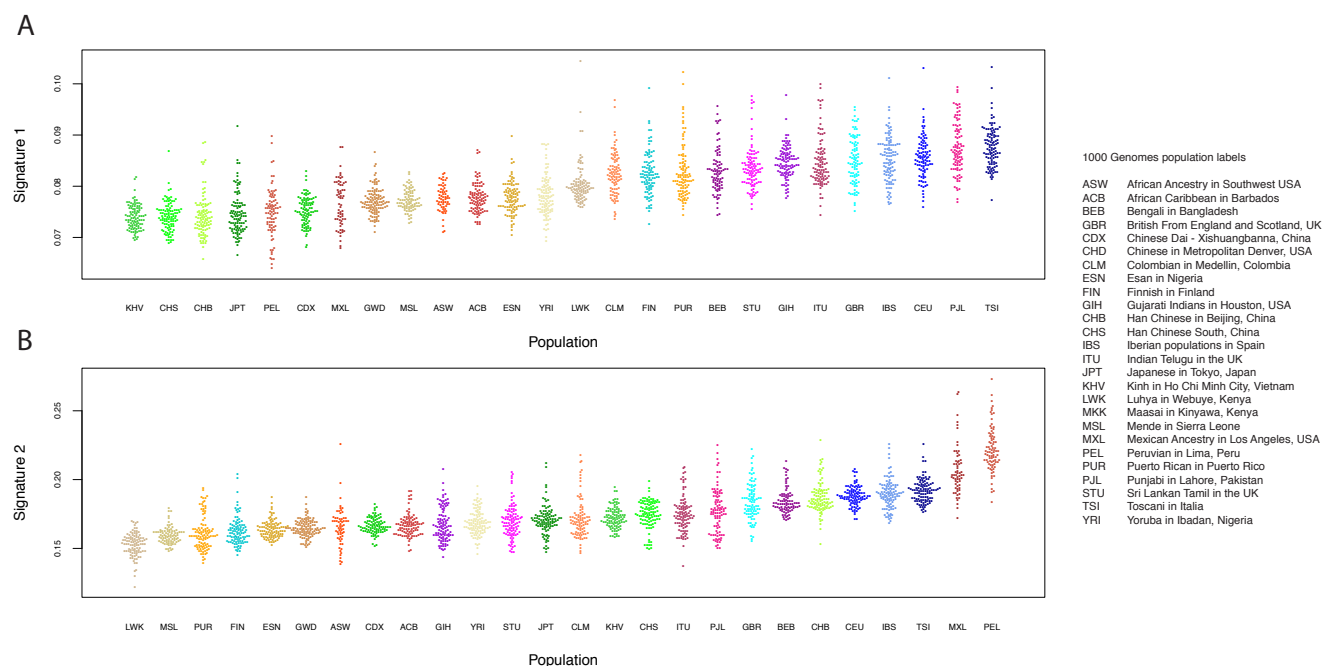

385  
386 **Figure 2:** Signatures 1 and 2 in the 1000 Genomes. **A:** Proportions of  $f_2$  and  $f_3$  variants in signature 1 (here  
387 defined as TCT>T, TCC>T, CCC>T and ACC>T) in each 1000 Genomes individual, by population. **B:**  
388 Proportions of  $f_2$  and  $f_3$  variants in signature 2 (here defined as NCG>T, for any N) in each 1000 Genomes  
389 individual, by population (five outlying samples excluded).

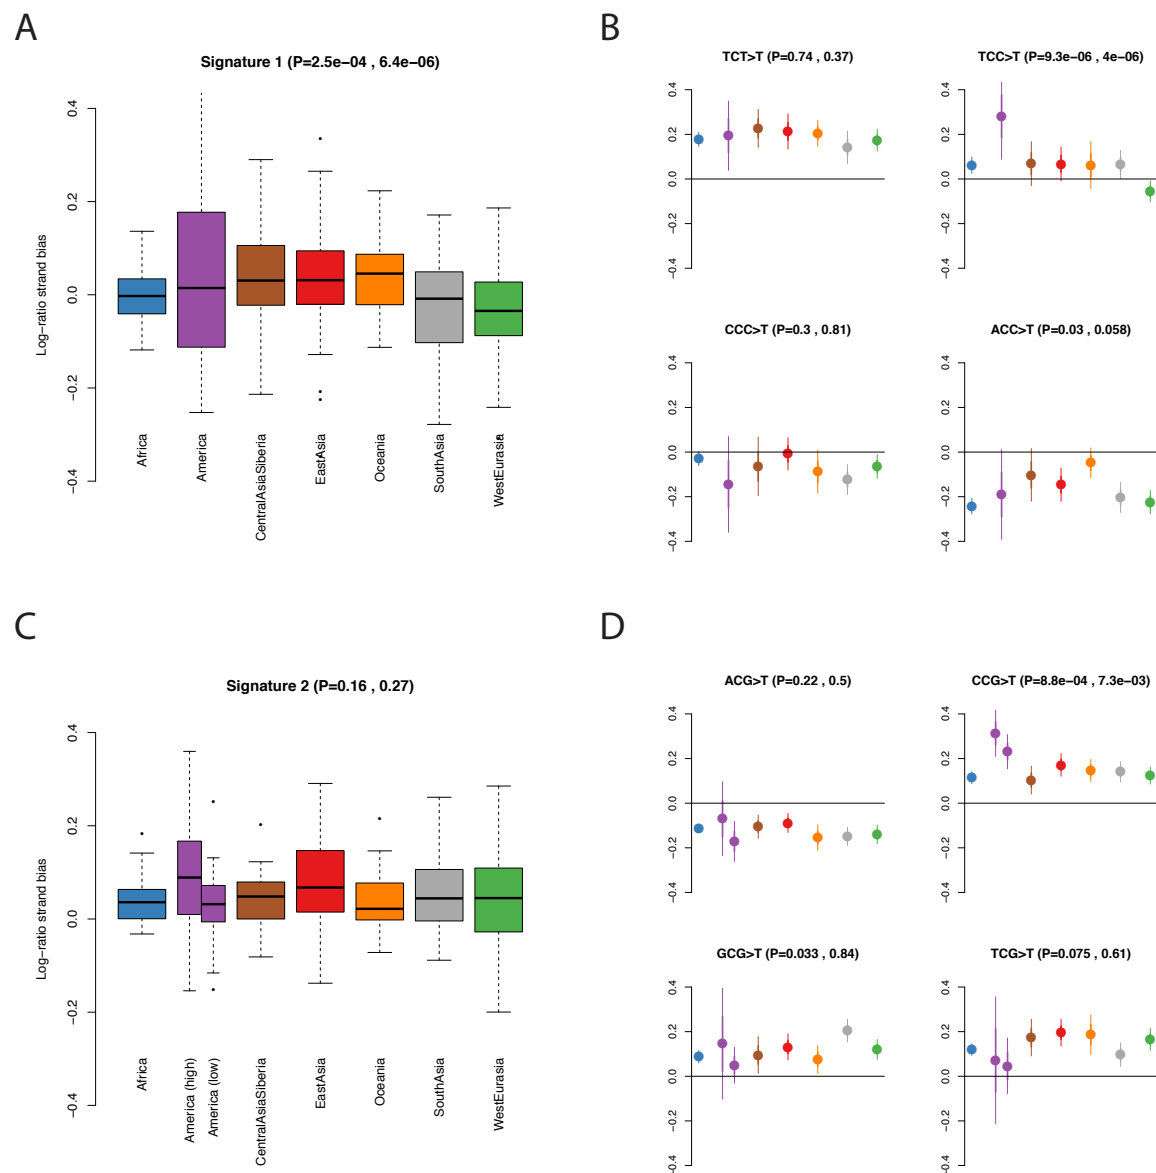

390  
391 **Figure 3:** Transcriptional strand bias in mutational signatures. We plot the log of the ratio of  $f_2$  mutations  
392 occurring on the untranscribed versus transcribed strand. Therefore a positive value indicates that the C>T  
393 mutation is more common than the G>A mutation on the untranscribed (i.e. coding) strand. P values in brackets  
394 are, respectively, ANOVA P-values for a difference between regions and t-test P-values for a difference between  
395 i) West Eurasia and other regions (excluding South Asia) in A&B ii) 11 American samples with high rates of  
396 signature 2 mutations and other regions in C&D. **A:** Boxplot of per-individual strand bias for mutations in  
397 signature 1 (TCT>T, TCC>T, CCC>T and ACC>T). One sample (S\_Mayan-2) with an extreme value (0.48) is  
398 not shown. **B:** Population-level means for each of the mutations comprising signature 1. **C,D:** as A&B but for  
399 signature 2. We separated out the 11 American samples with high rates of signature 2 mutations.



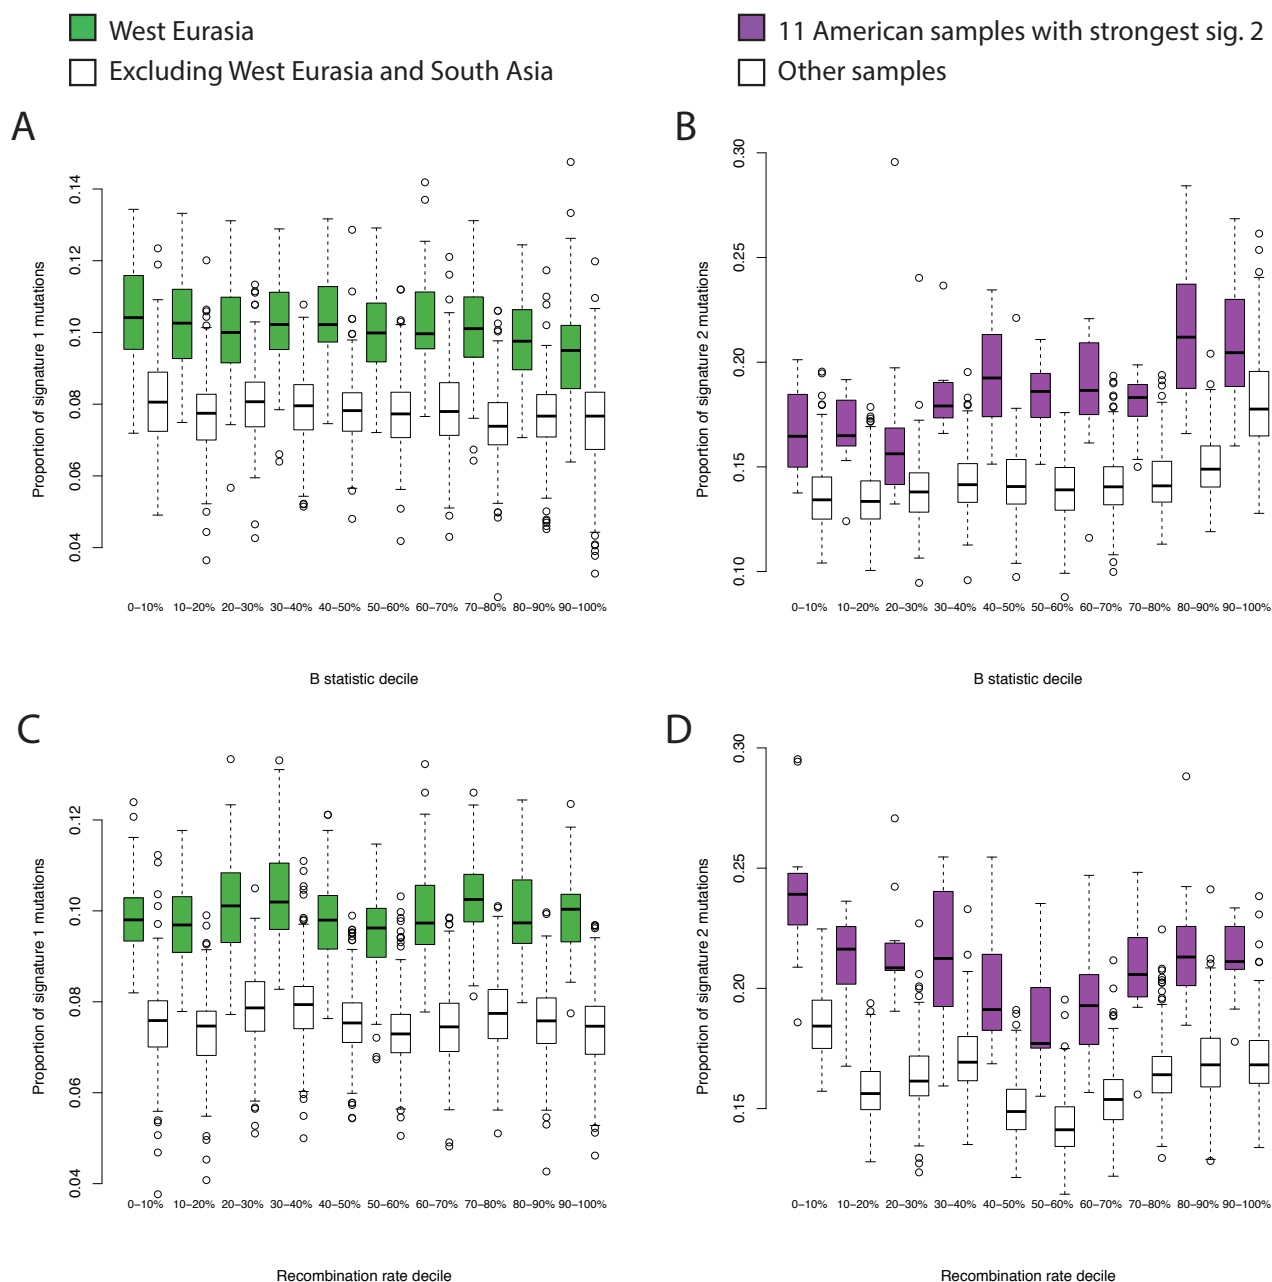

400  
401 **Figure 4:** Dependence of signatures on genomic features. **A,B:** dependence on conservation, measured by *B*  
402 statistic (0=lowest *B* statistic; highest conservation). **A:** Comparison of proportions of signature 1 mutations  
403 between West Eurasia and other populations (excluding South Asia). **B:** Comparison of proportions of signature 2  
404 mutations between the 11 American samples with the highest proportions, and all other samples. **C,D:** As A&B,  
405 but showing dependence on recombination rate decile computed in 1kb bins.  
406

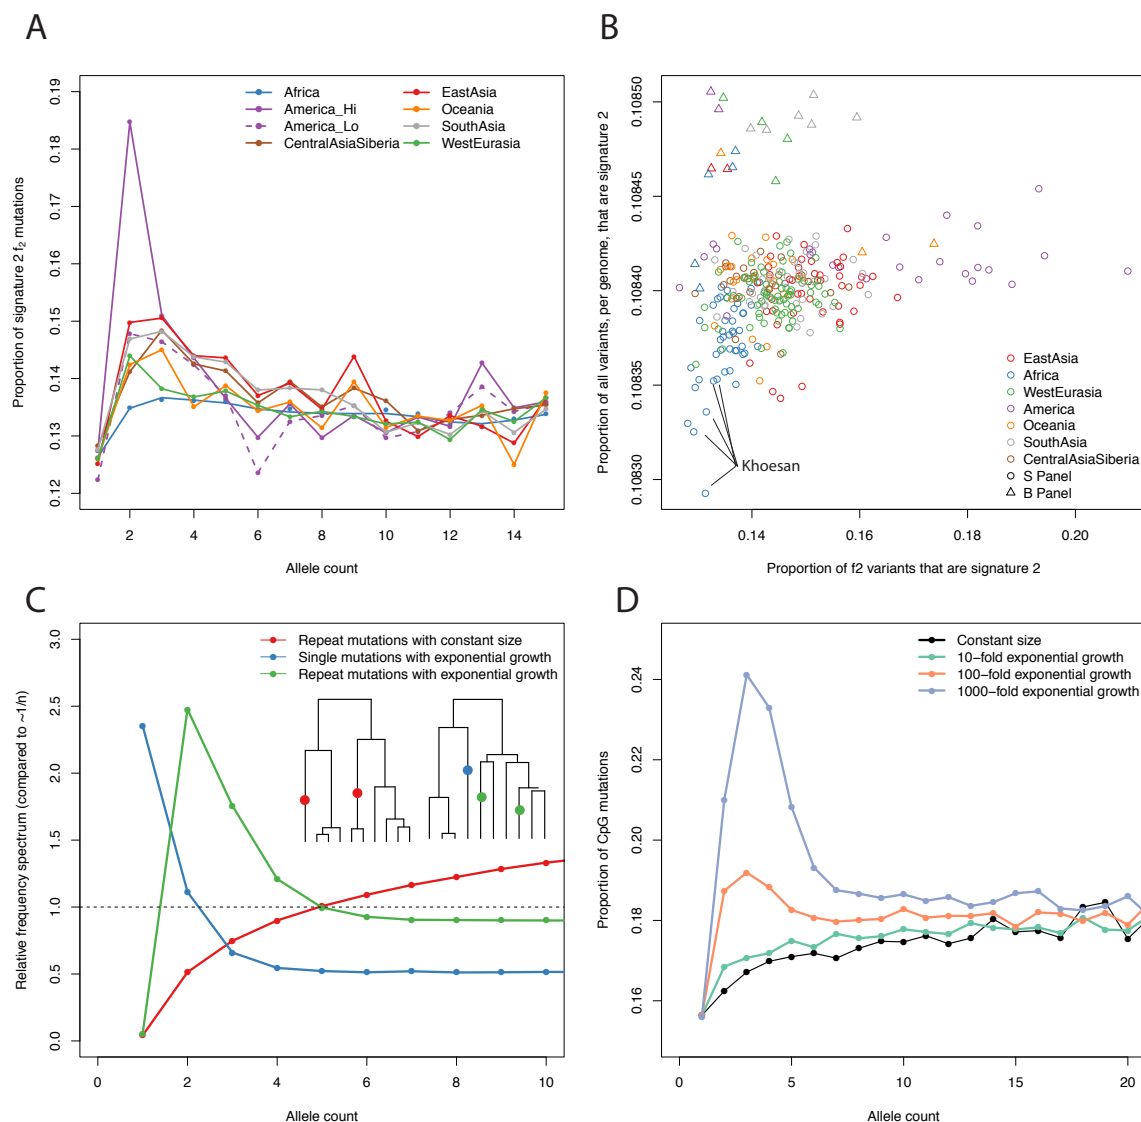

407

408 **Figure 5:** Differences in signature 2 can be explained by demography. **A:** The proportion of variants that are in  
 409 signature 2 for different regions, for allele counts from 1 to 20. **B:** The proportion of variants that are in signature  
 410 2 for  $f_2$  variants on the x-axis, and all variants per-genome on the y-axis. Samples in SGDP panel B, processed in  
 411 a different pipeline, shown as triangles. **C:** Simulated allele frequency spectra for repeat mutations for 50  
 412 haplotypes under the standard (i.e. constant population size) coalescent, and both single and repeat mutations  
 413 under the coalescent with exponential growth (100-fold in  $0.04 N_e$  generations). The y-axis is scaled by the  
 414 expected frequency of single mutations in the constant size case (i.e.  $1/n$ ). Inset trees show examples of the  
 415 genealogies obtained – constant size on left, exponential growth on right. Results from 200,000 independent trees.  
 416 **D:** Simulation of the proportion of mutations that are at CpG sites at different frequencies, assuming that 15% of  
 417 all mutations are CpGs and 10% of CpGs are repeat mutations. Compare to **A**.

418

419 **Figure 6:** Details of signature 1 **A:** The proportion of variants that  
420 are in signature 1 for  $f_2$  variants on the x-axis, and all variants per-  
421 genome on the y-axis. Samples in panel B, processed in a different  
422 pipeline, shown as triangles. **B:** Proportion of mutations in  
423 signature 1 as a function of derived allele count from 2 to 30. **C:**  
424 Signature 1, corrected to be robust to ancient DNA damage  
425 (Methods), for  $f_2$  variants in the SGDP and five high coverage  
426 ancient genomes. Solid lines show 5-95% bootstrap quantiles.  
427

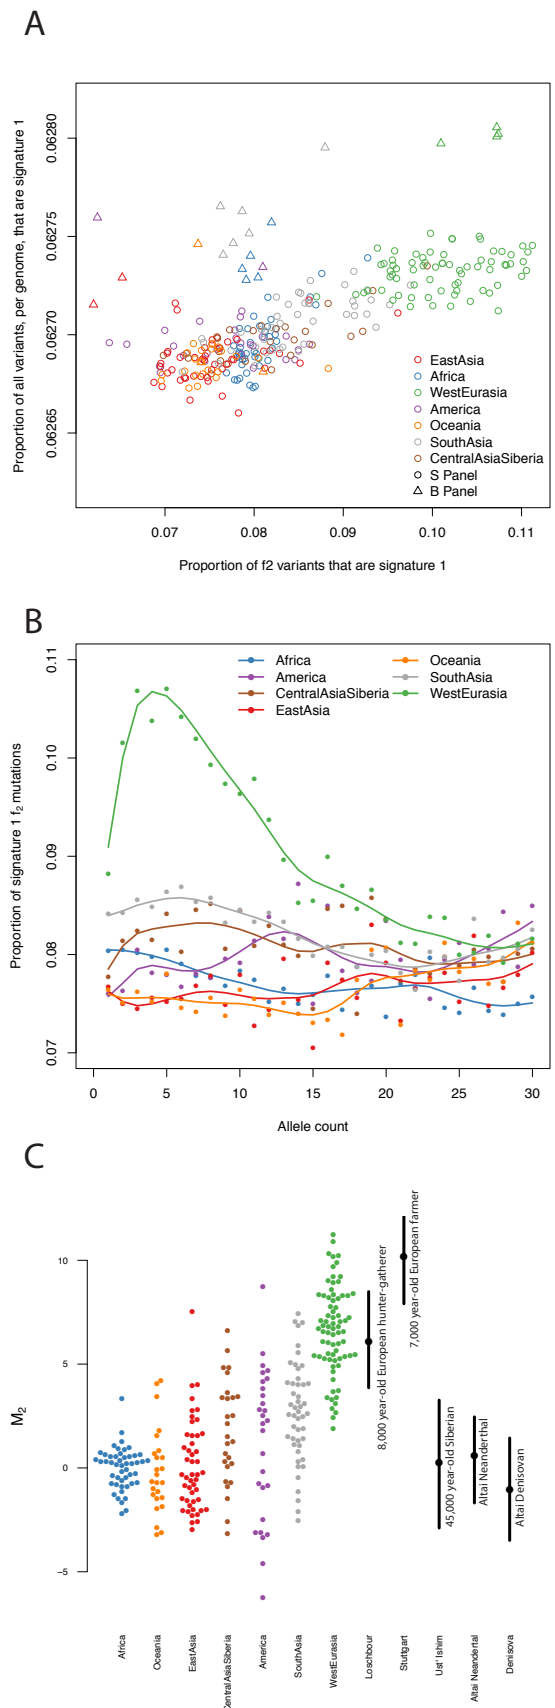

## 428 References

- 429 1. Segurel L, Wyman MJ, Przeworski M. Determinants of mutation rate variation in the human germline.  
430 Annual review of genomics and human genetics. 2014;15:47-70. doi: 10.1146/annurev-genom-031714-125740.  
431 PubMed PMID: 25000986.
- 432 2. Scally A. Mutation rates and the evolution of germline structure. Philosophical transactions of the Royal  
433 Society of London Series B, Biological sciences. 2016;371(1699). doi: 10.1098/rstb.2015.0137. PubMed PMID:  
434 27325834.
- 435 3. Genome of the Netherlands Consortium. Whole-genome sequence variation, population structure and  
436 demographic history of the Dutch population. Nature genetics. 2014;46(8):818-25. doi: 10.1038/ng.3021. PubMed  
437 PMID: 24974849.
- 438 4. Kong A, Frigge ML, Masson G, Besenbacher S, Sulem P, Magnusson G, et al. Rate of de novo mutations  
439 and the importance of father's age to disease risk. Nature. 2012;488(7412):471-5. doi: 10.1038/nature11396.  
440 PubMed PMID: 22914163; PubMed Central PMCID: PMC3548427.
- 441 5. Rahbari R, Wuster A, Lindsay SJ, Hardwick RJ, Alexandrov LB, Al Turki S, et al. Timing, rates and  
442 spectra of human germline mutation. Nature genetics. 2016;48(2):126-33. doi: 10.1038/ng.3469. PubMed PMID:  
443 26656846; PubMed Central PMCID: PMC4731925.
- 444 6. Amster G, Sella G. Life history effects on the molecular clock of autosomes and sex chromosomes.  
445 Proceedings of the National Academy of Sciences of the United States of America. 2016;113(6):1588-93. doi:  
446 10.1073/pnas.1515798113. PubMed PMID: 26811451; PubMed Central PMCID: PMC4760823.
- 447 7. Gao Z, Wyman MJ, Sella G, Przeworski M. Interpreting the Dependence of Mutation Rates on Age and  
448 Time. PLoS biology. 2016;14(1):e1002355. doi: 10.1371/journal.pbio.1002355. PubMed PMID: 26761240;  
449 PubMed Central PMCID: PMC4711947.
- 450 8. Harris K. Evidence for recent, population-specific evolution of the human mutation rate. Proceedings of  
451 the National Academy of Sciences of the United States of America. 2015;112(11):3439-44. doi:  
452 10.1073/pnas.1418652112. PubMed PMID: 25733855; PubMed Central PMCID: PMC4371947.
- 453 9. Harris K, Pritchard J. Rapid evolution of the human mutation spectrum. BiorXiv. 2016. doi:  
454 <http://dx.doi.org/10.1101/084343>.
- 455 10. Alexandrov LB, Nik-Zainal S, Wedge DC, Aparicio SA, Behjati S, Biankin AV, et al. Signatures of  
456 mutational processes in human cancer. Nature. 2013;500(7463):415-21. doi: 10.1038/nature12477. PubMed  
457 PMID: 23945592; PubMed Central PMCID: PMC3776390.
- 458 11. Alexandrov LB, Nik-Zainal S, Wedge DC, Campbell PJ, Stratton MR. Deciphering signatures of  
459 mutational processes operative in human cancer. Cell reports. 2013;3(1):246-59. doi:  
460 10.1016/j.celrep.2012.12.008. PubMed PMID: 23318258; PubMed Central PMCID: PMC3588146.
- 461 12. Behjati S, Huch M, van Boxtel R, Karthaus W, Wedge DC, Tamuri AU, et al. Genome sequencing of  
462 normal cells reveals developmental lineages and mutational processes. Nature. 2014;513(7518):422-5. doi:  
463 10.1038/nature13448. PubMed PMID: 25043003; PubMed Central PMCID: PMC4227286.
- 464 13. Mallick S, Li H, Lipson M, Mathieson I, Gymrek M, Racimo F, et al. The Simons Genome Diversity  
465 Project: 300 genomes from 142 diverse populations. Nature. 2016;538(7624):201-6. doi: 10.1038/nature18964.  
466 PubMed PMID: 27654912.
- 467 14. Nelson MR, Wegmann D, Ehm MG, Kessner D, St Jean P, Verzilli C, et al. An abundance of rare  
468 functional variants in 202 drug target genes sequenced in 14,002 people. Science. 2012;337(6090):100-4. doi:  
469 10.1126/science.1217876. PubMed PMID: 22604722; PubMed Central PMCID: PMC4319976.
- 470 15. Lee DD, Seung HS. Learning the parts of objects by non-negative matrix factorization. Nature.  
471 1999;401(6755):788-91. doi: 10.1038/44565. PubMed PMID: 10548103.
- 472 16. Gaujoux R, Seoighe C. A flexible R package for nonnegative matrix factorization. BMC bioinformatics.  
473 2010;11:367. doi: 10.1186/1471-2105-11-367. PubMed PMID: 20598126; PubMed Central PMCID:  
474 PMC2912887.
- 475 17. Ardin M, Cahais V, Castells X, Bouaoun L, Byrnes G, Herceg Z, et al. MutSpec: a Galaxy toolbox for  
476 streamlined analyses of somatic mutation spectra in human and mouse cancer genomes. BMC bioinformatics.

2016;17:170. doi: 10.1186/s12859-016-1011-z. PubMed PMID: 27091472; PubMed Central PMCID: PMC4835840.

18. Nik-Zainal S, Alexandrov LB, Wedge DC, Van Loo P, Greenman CD, Raine K, et al. Mutational processes molding the genomes of 21 breast cancers. *Cell*. 2012;149(5):979-93. doi: 10.1016/j.cell.2012.04.024. PubMed PMID: 22608084; PubMed Central PMCID: PMC3414841.

19. Forbes SA, Beare D, Gunasekaran P, Leung K, Bindal N, Boutselakis H, et al. COSMIC: exploring the world's knowledge of somatic mutations in human cancer. *Nucleic acids research*. 2015;43(Database issue):D805-11. doi: 10.1093/nar/gku1075. PubMed PMID: 25355519; PubMed Central PMCID: PMC4383913.

20. The 1000 Genomes Project Consortium. A global reference for human genetic variation. *Nature*. 2015;526(7571):68-74. doi: 10.1038/nature15393. PubMed PMID: 26432245; PubMed Central PMCID: PMC4750478.

21. Green P, Ewing B, Miller W, Thomas PJ, Program NCS, Green ED. Transcription-associated mutational asymmetry in mammalian evolution. *Nature genetics*. 2003;33(4):514-7. doi: 10.1038/ng1103. PubMed PMID: 12612582.

22. Encode Project Consortium. An integrated encyclopedia of DNA elements in the human genome. *Nature*. 2012;489(7414):57-74. doi: 10.1038/nature11247. PubMed PMID: 22955616; PubMed Central PMCID: PMC3439153.

23. McVicker G, Gordon D, Davis C, Green P. Widespread genomic signatures of natural selection in hominid evolution. *PLoS genetics*. 2009;5(5):e1000471. doi: 10.1371/journal.pgen.1000471. PubMed PMID: 19424416; PubMed Central PMCID: PMC2669884.

24. Cooper DN, Youssoufian H. The CpG dinucleotide and human genetic disease. *Hum Genet*. 1988;78(2):151-5. PubMed PMID: 3338800.

25. Rimmer A, Phan H, Mathieson I, Iqbal Z, Twigg SR, Consortium WGS, et al. Integrating mapping-, assembly- and haplotype-based approaches for calling variants in clinical sequencing applications. *Nature genetics*. 2014;46(8):912-8. doi: 10.1038/ng.3036. PubMed PMID: 25017105; PubMed Central PMCID: PMC4753679.

26. Lek M, Karczewski KJ, Minikel EV, Samocha KE, Banks E, Fennell T, et al. Analysis of protein-coding genetic variation in 60,706 humans. *Nature*. 2016;536(7616):285-91. doi: 10.1038/nature19057. PubMed PMID: 27535533; PubMed Central PMCID: PMC45018207.

27. Jenkins PA, Mueller JW, Song YS. General triallelic frequency spectrum under demographic models with variable population size. *Genetics*. 2014;196(1):295-311. doi: 10.1534/genetics.113.158584. PubMed PMID: 24214345; PubMed Central PMCID: PMC43872192.

28. Lazaridis I, Patterson N, Mittnik A, Renaud G, Mallick S, Kirsanow K, et al. Ancient human genomes suggest three ancestral populations for present-day Europeans. *Nature*. 2014;513(7518):409-13. doi: 10.1038/nature13673. PubMed PMID: 25230663; PubMed Central PMCID: PMC4170574.

29. Fu Q, Li H, Moorjani P, Jay F, Slepchenko SM, Bondarev AA, et al. Genome sequence of a 45,000-year-old modern human from western Siberia. *Nature*. 2014;514(7523):445-9. doi: 10.1038/nature13810. PubMed PMID: 25341783.

30. Prufer K, Racimo F, Patterson N, Jay F, Sankararaman S, Sawyer S, et al. The complete genome sequence of a Neanderthal from the Altai Mountains. *Nature*. 2014;505(7481):43-9. doi: 10.1038/nature12886. PubMed PMID: 24352235; PubMed Central PMCID: PMC4031459.

31. Meyer M, Kircher M, Gansauge MT, Li H, Racimo F, Mallick S, et al. A high-coverage genome sequence from an archaic Denisovan individual. *Science*. 2012;338(6104):222-6. doi: 10.1126/science.1224344. PubMed PMID: 22936568; PubMed Central PMCID: PMC3617501.

32. Scally A, Durbin R. Revising the human mutation rate: implications for understanding human evolution. *Nature reviews Genetics*. 2012;13(10):745-53. doi: 10.1038/nrg3295. PubMed PMID: 22965354.

33. Hyvärinen A. Fast and Robust Fixed-Point Algorithms for Independent Component Analysis. *IEEE Transactions on Neural Networks*. 1999;10(3).

34. International HapMap Consortium. A haplotype map of the human genome. *Nature*. 2005;437(7063):1299-320. doi: 10.1038/nature04226. PubMed PMID: 16255080; PubMed Central PMCID: PMC1880871.

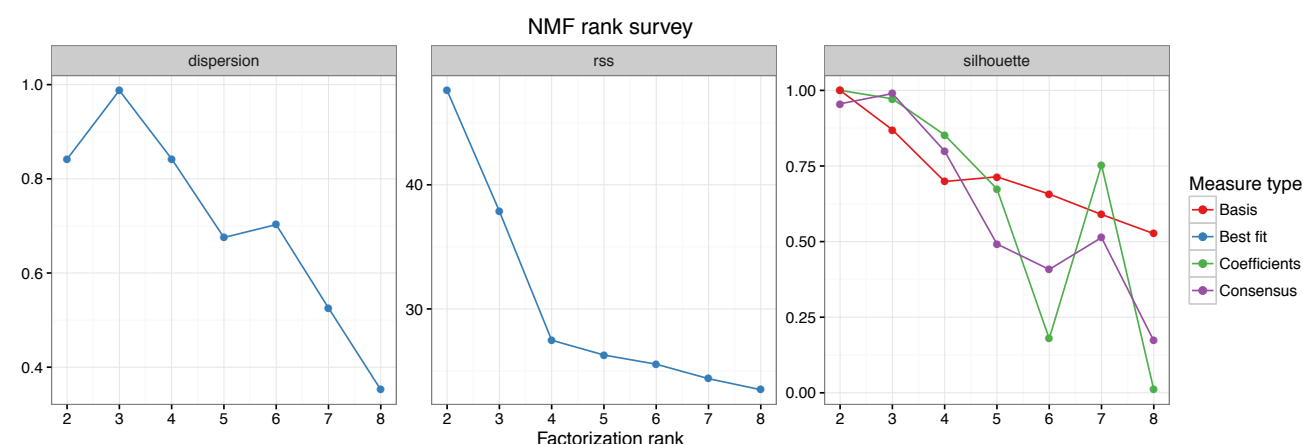

528

529 **Supplementary Figure 1:** Diagnostic plots for NMF using variants of frequency 2. Each plot shows the value of  
530 a measure, computed over 50 random start points, for factorization ranks from 2 to 8. From left to right:  
531 Dispersion, a measure of reproducibility of clusters across runs (1=perfectly reproducible); Residual sum of  
532 squares (lower=better fit); Silhouette, a measure of how reliably elements can be assigned to clusters (1=perfectly  
533 reliably).

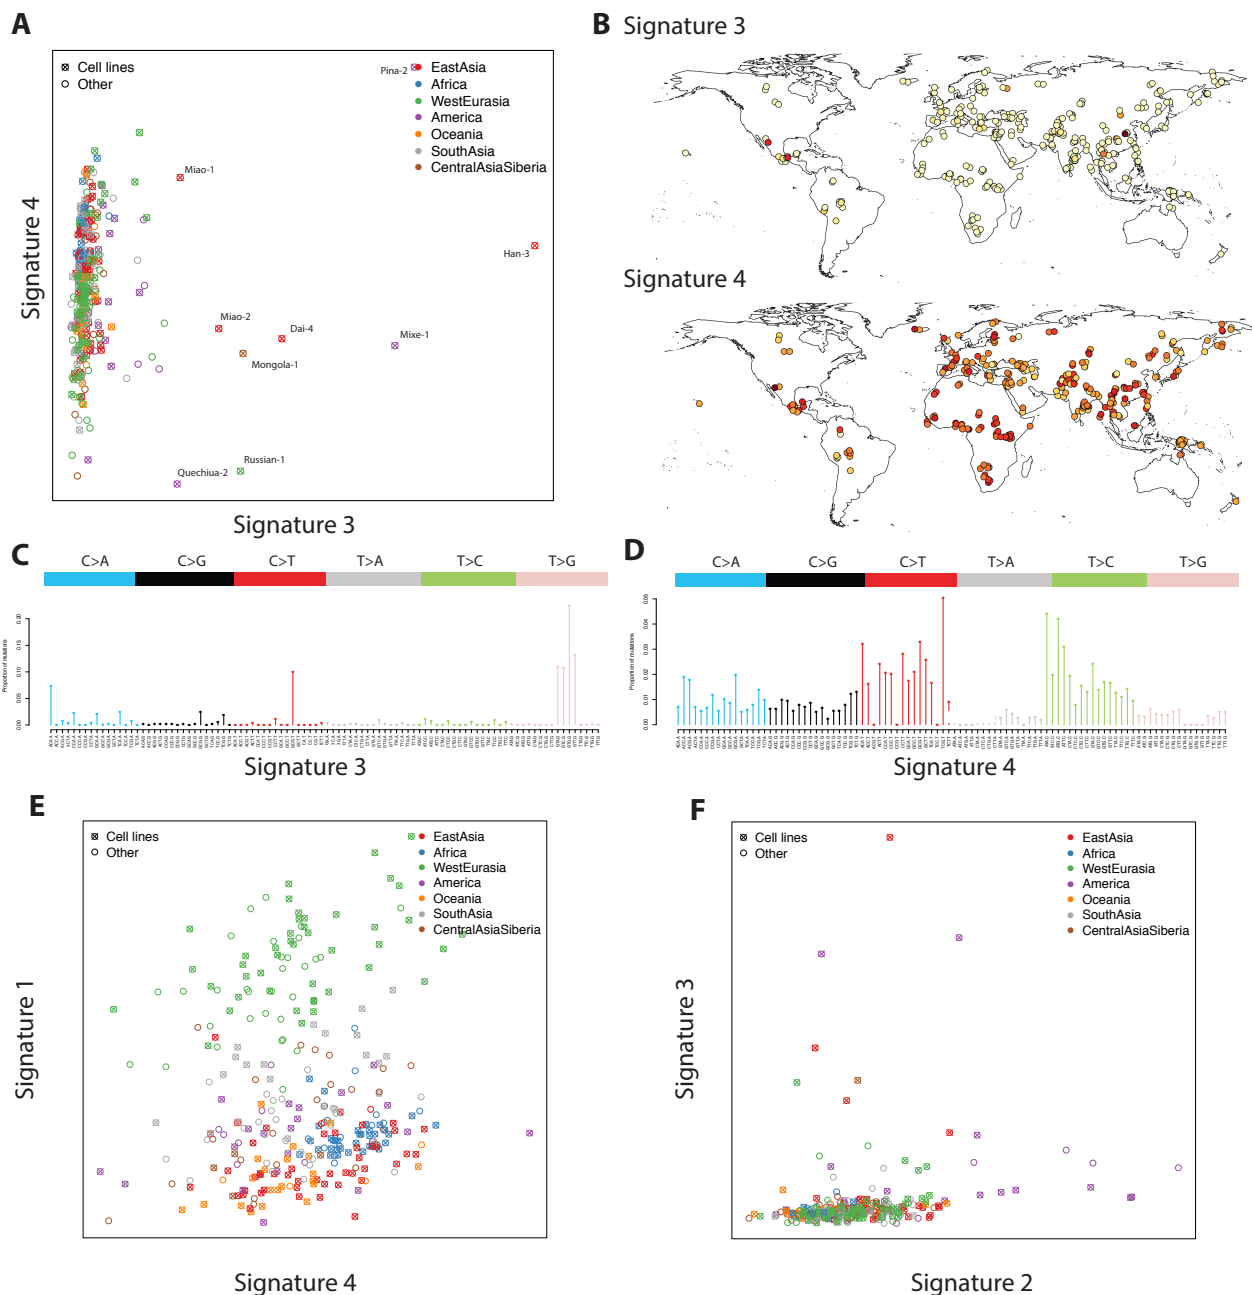

534

535 **Supplementary Figure 2:** Distribution and characterization of mutational signatures<sub>2,4</sub> 3 and 4. **A:** Per-sample  
536 coefficients for signatures 3 and 4. **B:** Geographic distribution of signatures 3 and 4. **C:** Mutational spectrum of  
537 signature 3. **D:** Mutational spectrum of signature 4. **E-F:** Comparison of loadings of 1 and 2 with signatures 3 and  
538 4. In supplementary plots, we denote the signatures obtained from  $f_r$  variants with rank  $k$  by signature<sub>r,k</sub>, so that  
539 signature<sub>2,4</sub> is equivalent to the signature in the main text.



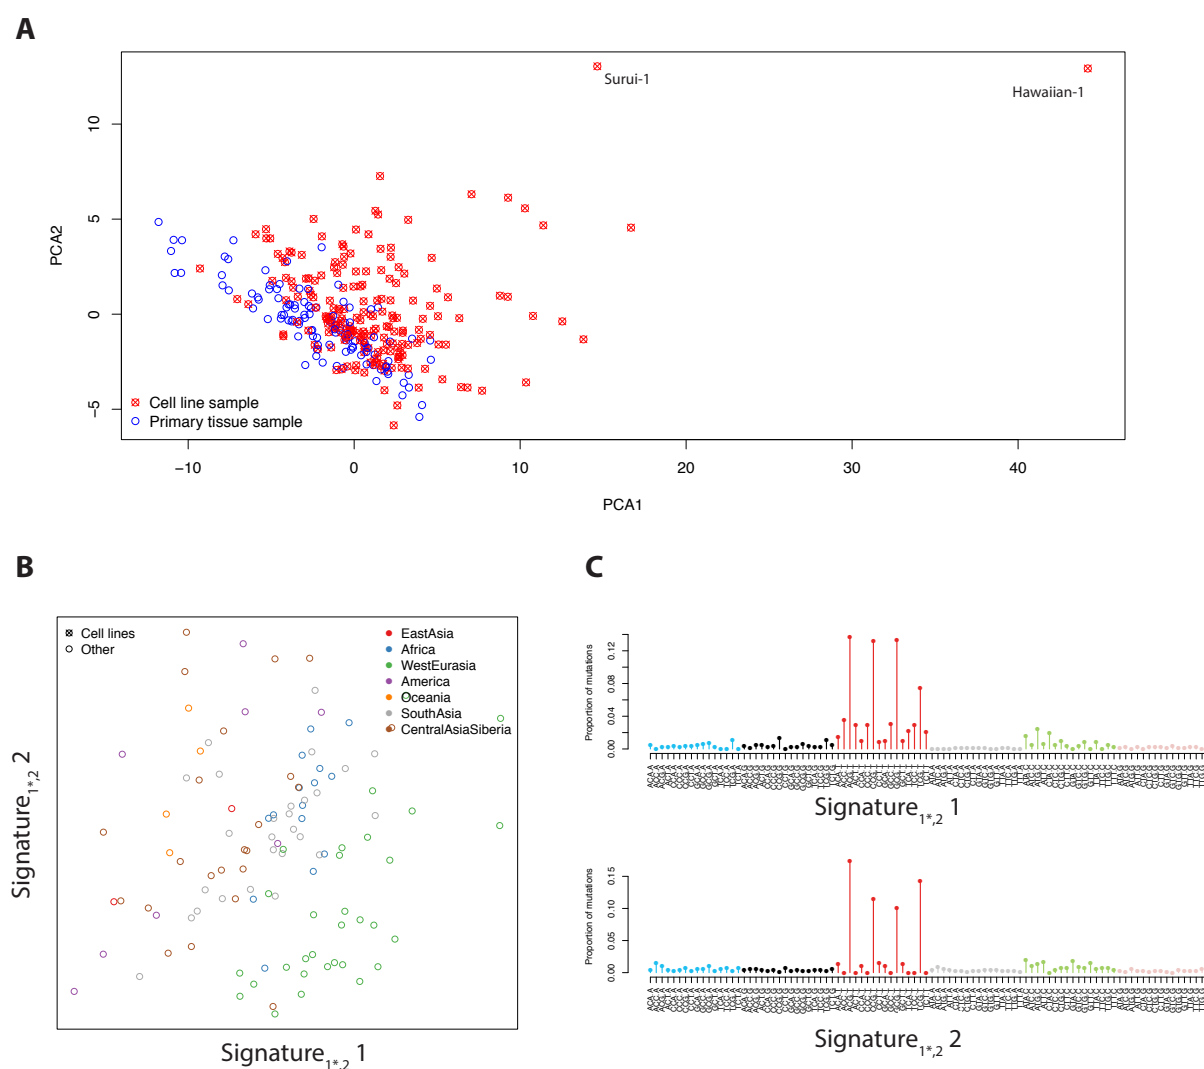

540

541 **Supplementary Figure 3:** Analysis of  $f_I$  variants **A:** The first two principal components of the mutational  
542 spectrum of  $f_I$  variants, showing the difference between cell line and primary tissue derived samples. **B&C:**  
543 Mutational signatures inferred from  $f_I$  variants with rank 2, but excluding cell line samples. **B:** Factor loadings for  
544 signature<sub>1\*2</sub> 1 and 2 (asterisk denotes no cell lines). **C:** Mutational signatures<sub>1\*2</sub> 1 and 2. Signature<sub>1\*2</sub> 1 is  
545 confounded with CpG mutations in this case, but clearly shows an elevated level of TCC>T and ACC>T  
546 mutations.

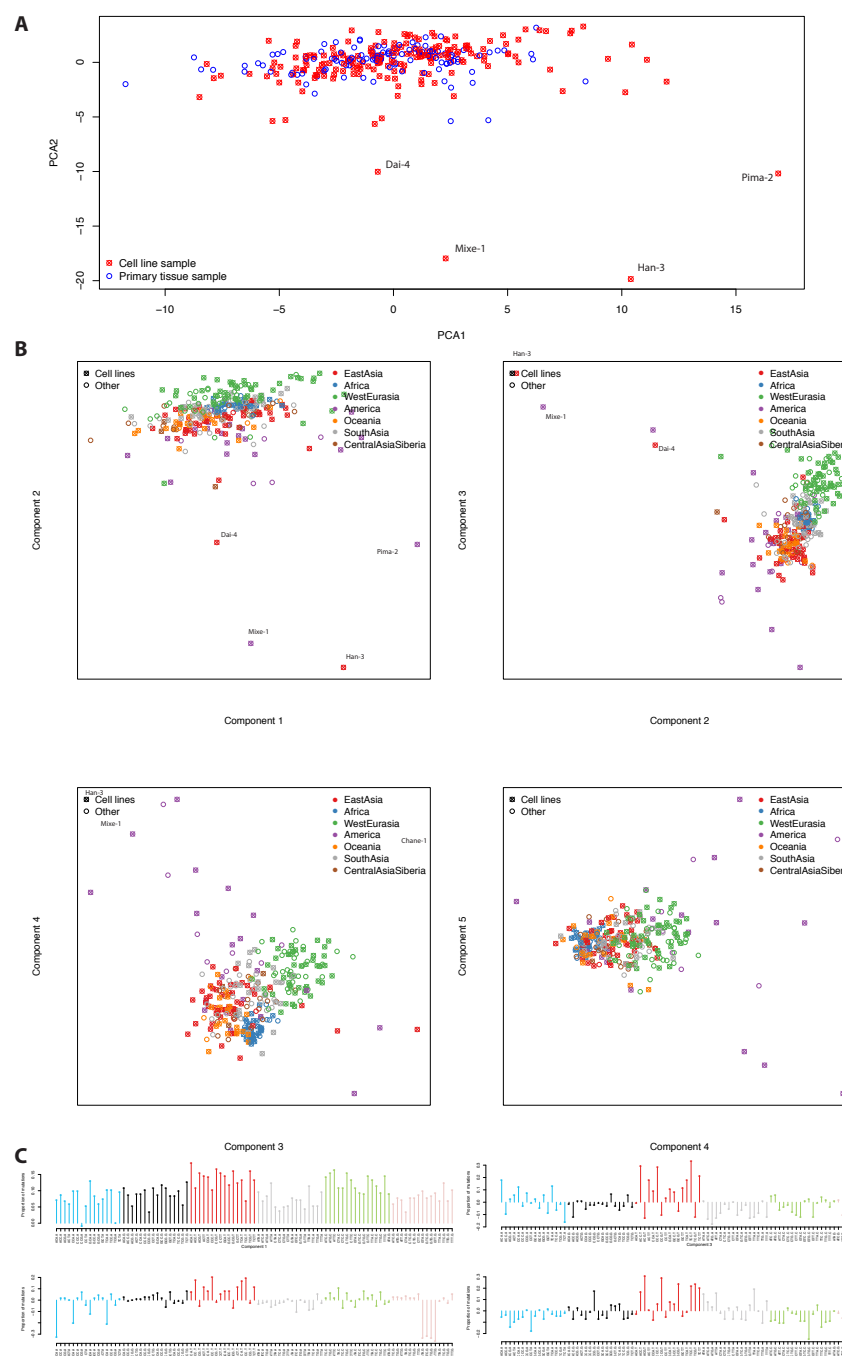

547

548 **Supplementary Figure 4:** Principal component analysis of the mutational spectrum of  $f_2$  variants. **A:** The first  
549 two principal components of the mutational spectrum of  $f_2$  variants, showing no difference between cell line and  
550 primary tissue derived samples. **B:** Principal component positions. Labeled by sample source (A) and geographic  
551 region (B). **C:** Component loadings. Note that principal components 2,3 and 4 correspond roughly to mutational  
552 signatures<sub>2,4</sub> 3, 2 and 1 respectively.

553

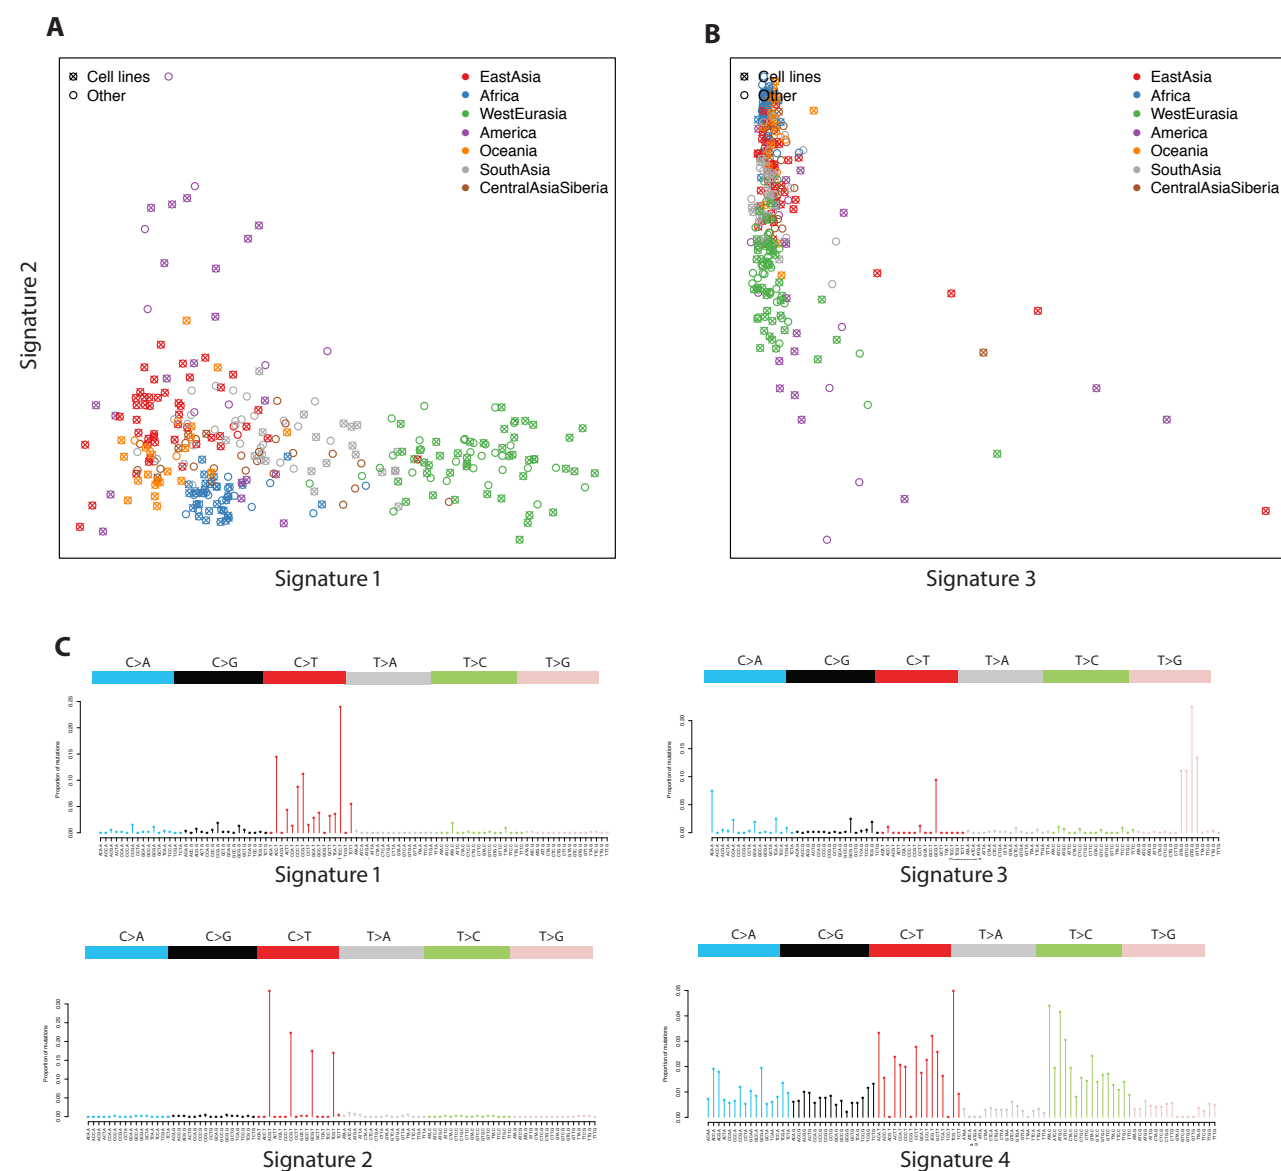

554  
555 **Supplementary Figure 5:** NMF analysis of f2 variants at rank 4 - as the main analysis, but normalizing the  
556 mutational spectra by the total number of mutations in each sample, rather than the number of ATA>C mutations.

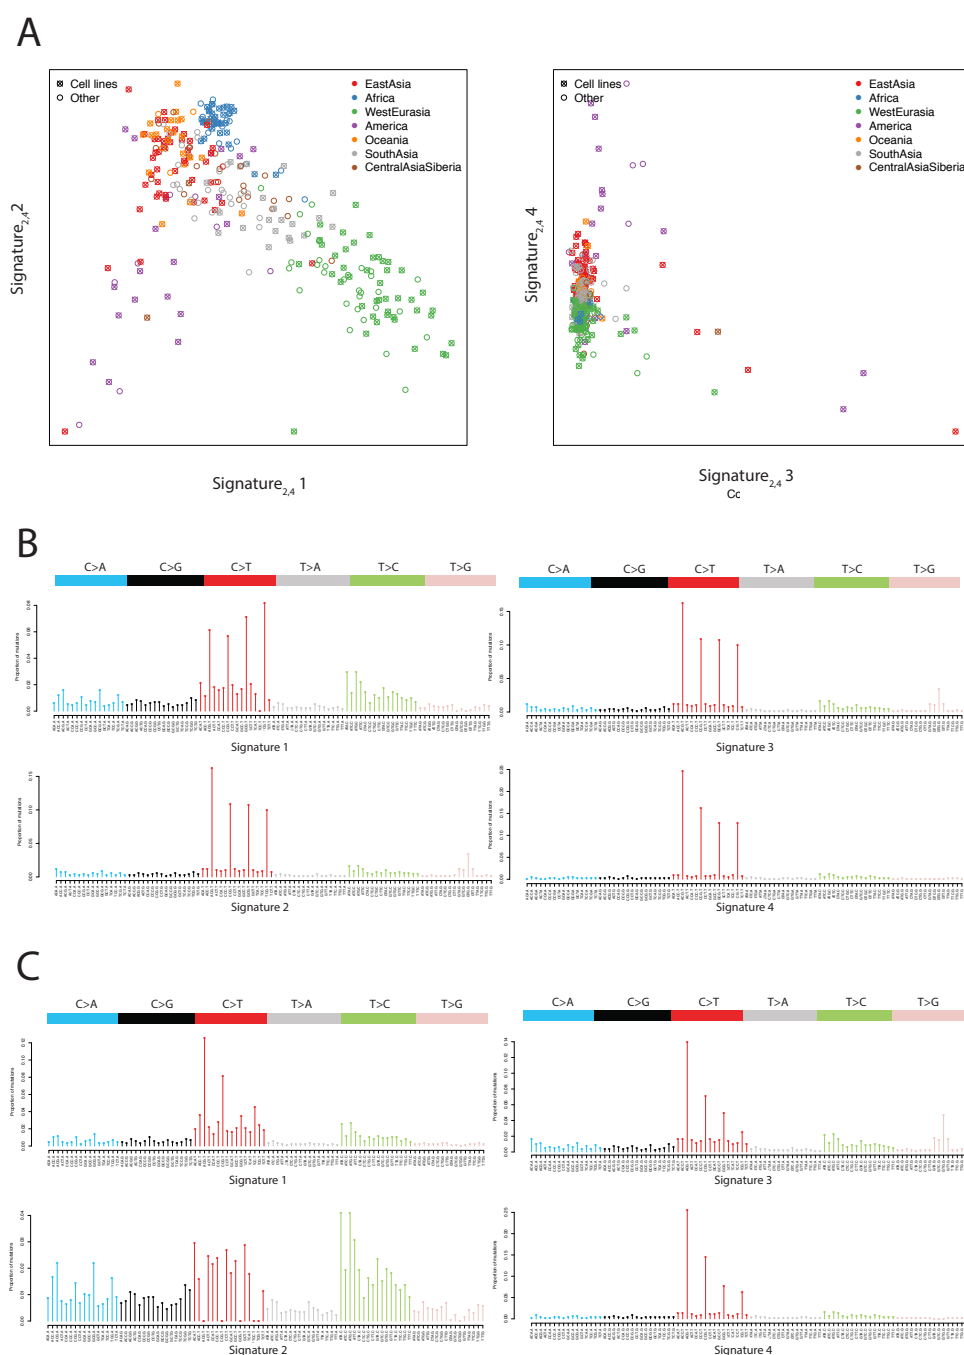

557

558 **Supplementary Figure 6:** NMF analysis of  $f_2$  variants at rank 4 with random initialization of the NMF algorithm.

559 **A:** Distribution of signatures across samples. **B:** Mutational signatures 1-4. **C:** Mutational signatures 1-4 where,

560 for each CpG mutation class, we subtracted the minimum over all four signatures from the signature.
